# Supplementary material
Source: Springer Nature journal article supplement (https://www.springermedizin.de/resource/supplementary/13048_2013_220_MOESM3_ESM.pdf/9665226)

Control

Letrozole

Aromatase

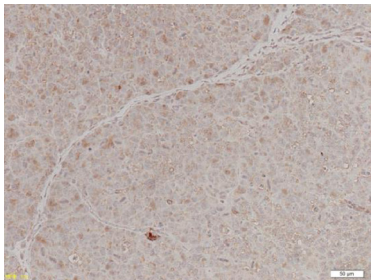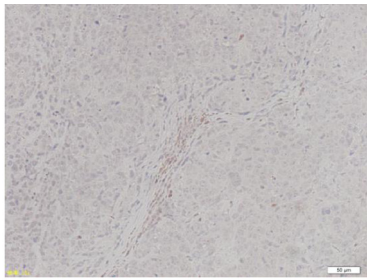

ER $\alpha$

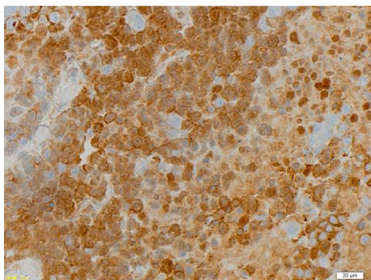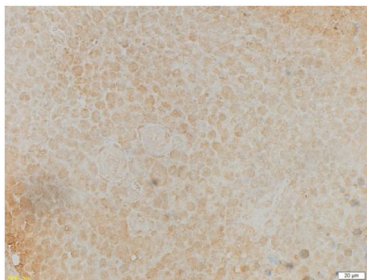

FOXP1

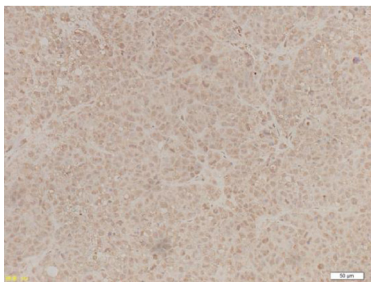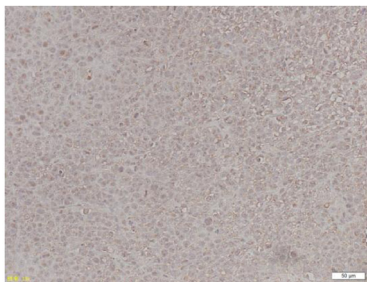

Supplement: MOESM3 [file 9665226]
